# Supplementary material for: The miR-144/Hmgn2 regulatory axis orchestrates chromatin organization during erythropoiesis
Source: PubMed Central journal article supplement (PMC11076586; doi:10.1038/s41467-024-47982-2), 2024-05-07
Supplement: 41467_2024_47982_MOESM1_ESM.pdf [file 41467_2024_47982_MOESM1_ESM.pdf]

# SUPPLEMENTARY INFORMATION

**The miR-144/Hmgn2 regulatory axis orchestrates chromatin organization during erythropoiesis.**

Dmitry A. Kretov<sup>1</sup>, Leighton Folkes<sup>2</sup>, Alexandra Mora-Martin<sup>1</sup>, Isha A. Walawalkar<sup>1</sup>, Imrat<sup>1</sup>, Noreen Syedah<sup>1</sup>, Kim Vanuytsel<sup>3,4,5</sup>, Simon Moxon<sup>2</sup>, George J. Murphy<sup>3,4</sup>, Daniel Cifuentes<sup>1,6,†,\*</sup>

<sup>1</sup>Department of Biochemistry and Cell Biology, Boston University Chobanian & Avedisian School of Medicine, Boston, MA

<sup>2</sup>School of Biological Sciences, University of East Anglia, Norwich, UK

<sup>3</sup>Center for Regenerative Medicine, Boston University Chobanian & Avedisian School of Medicine, Boston, MA

<sup>4</sup>Section of Hematology and Oncology, Department of Medicine, Boston Medical Center, Boston, Massachusetts, USA

<sup>5</sup>Amyloidosis Center, Boston University Chobanian and Avedisian School of Medicine, Boston, Massachusetts, USA

<sup>6</sup>Department of Virology, Immunology and Microbiology, Boston University Chobanian & Avedisian School of Medicine, Boston, MA

†Lead contact: Daniel Cifuentes

\*Correspondence: [dcb@bu.edu](mailto:dcb@bu.edu)

# Figure S1

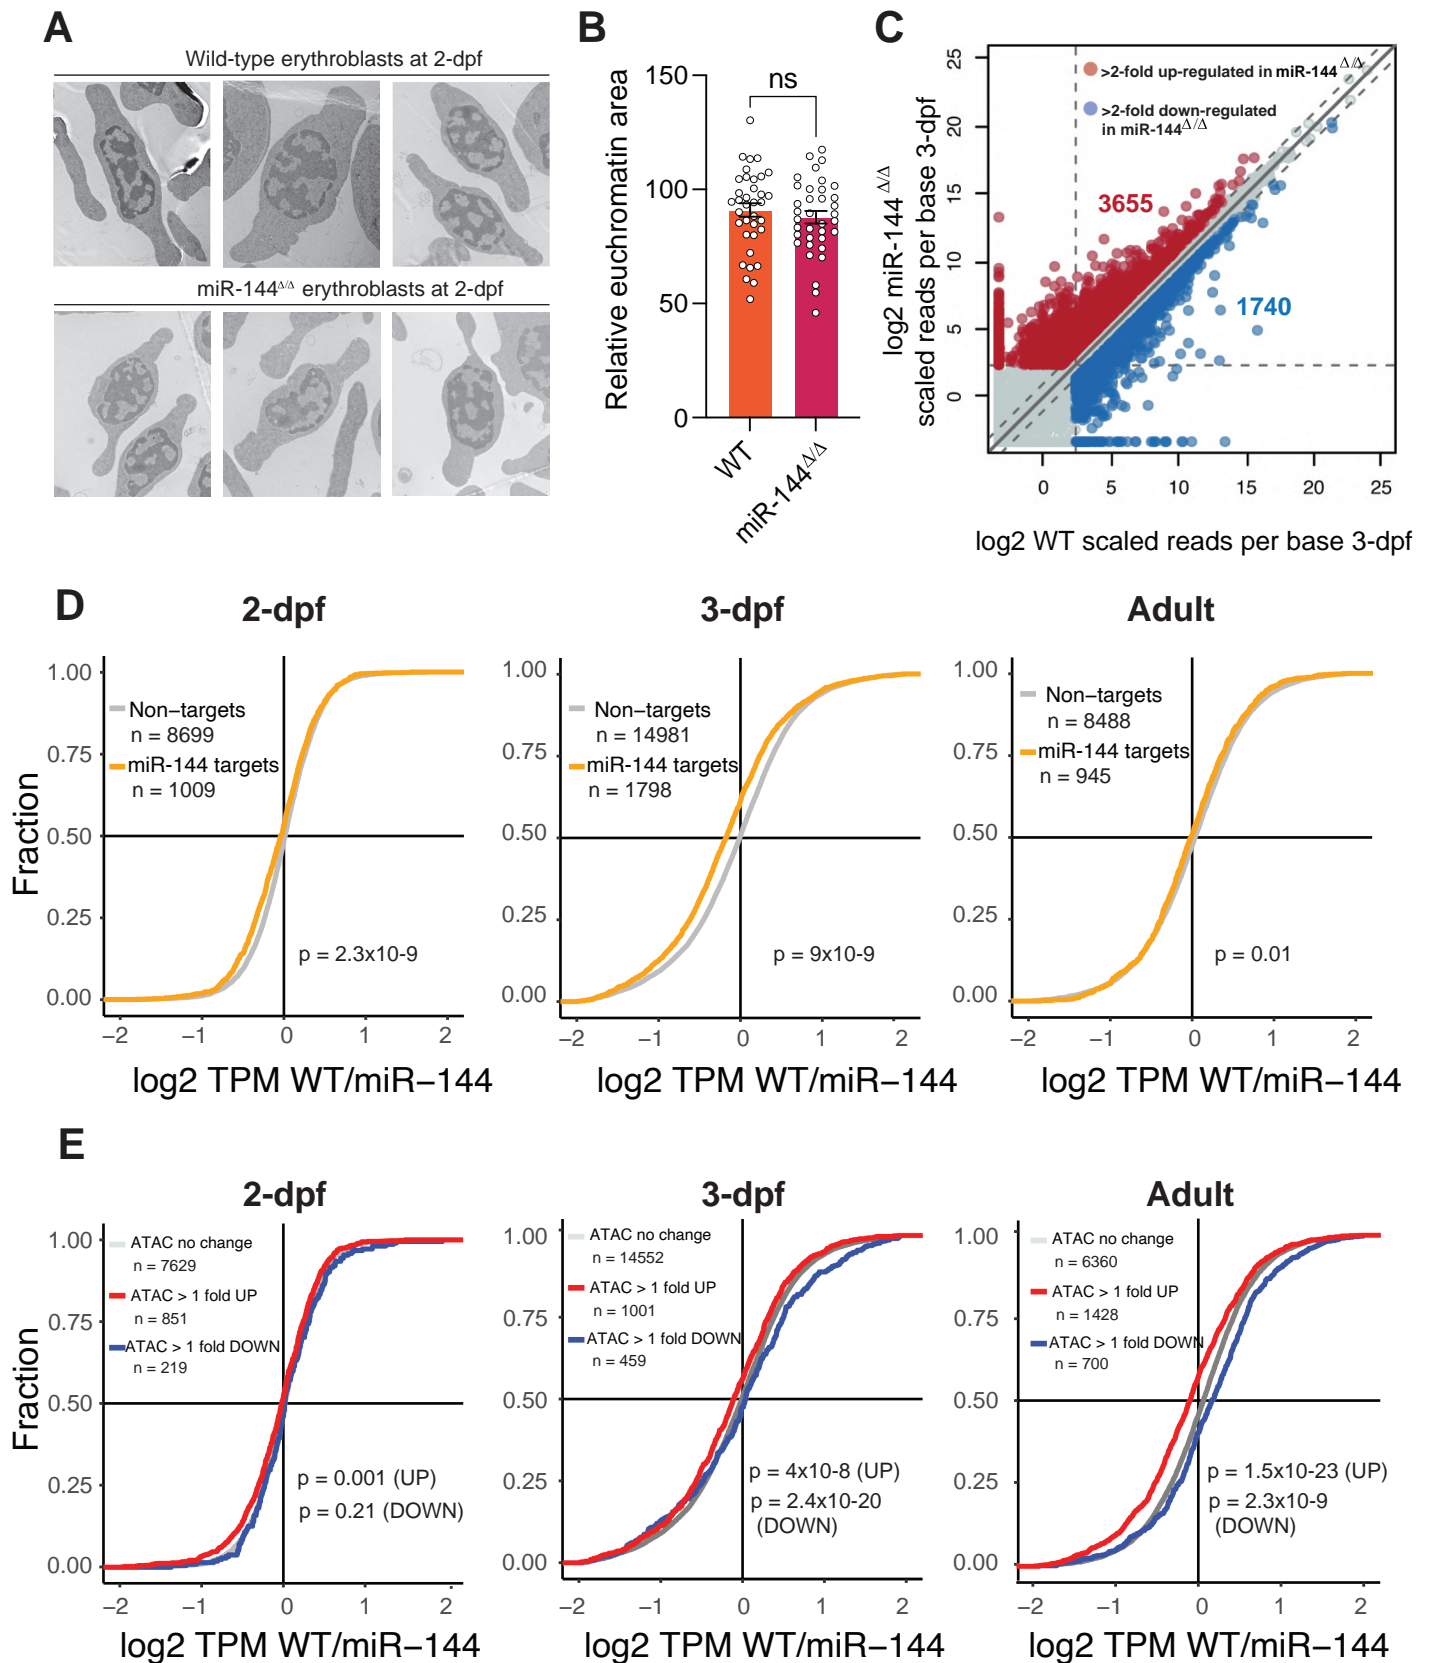

**Figure S1. Related to Main Figure 1. Cellular, transcriptomic, and genomic effects of miR-144 loss during erythropoiesis.**

**(A)** Transmission Electron Microscopy of erythrocytes isolated from 2-dpf embryos.

**(B)** Quantification of euchromatic regions of the nuclei from (A). Individual cells (n=35) are analyzed in each case. *p*-values from two-tailed unpaired *t*-test. Error bars represent standard error of the mean.

**(C)** RNA-Sequencing of erythrocytes isolated from 3-dpf from miR-144<sup>ΔΔ</sup> zebrafish and wild-type siblings. Average of 2 biological replicates is plotted. Each biological replicate represents the peripheral blood extracted from pools of ~100 embryos from different clutches.

**(D)** Cumulative distributions of fold changes revealed by RNA-Sequencing between wild-type and miR-144<sup>ΔΔ</sup> and wild-type erythrocytes for curated miR-144 targets (expressed more than 5 scaled reads per base in erythrocytes and have predicted miR-144 targets sites according to TargetScan (red line) and non-targets (grey).

**(E)** Cumulative distributions of fold changes of gene expression revealed by RNA-Sequencing between miR-144<sup>ΔΔ</sup> and wild-type erythrocytes for the genes with increased more than 1-fold (red line), decreased more than 1-fold (blue line) and not changed (gray line) chromatin accessibility in genes.

# Figure S2

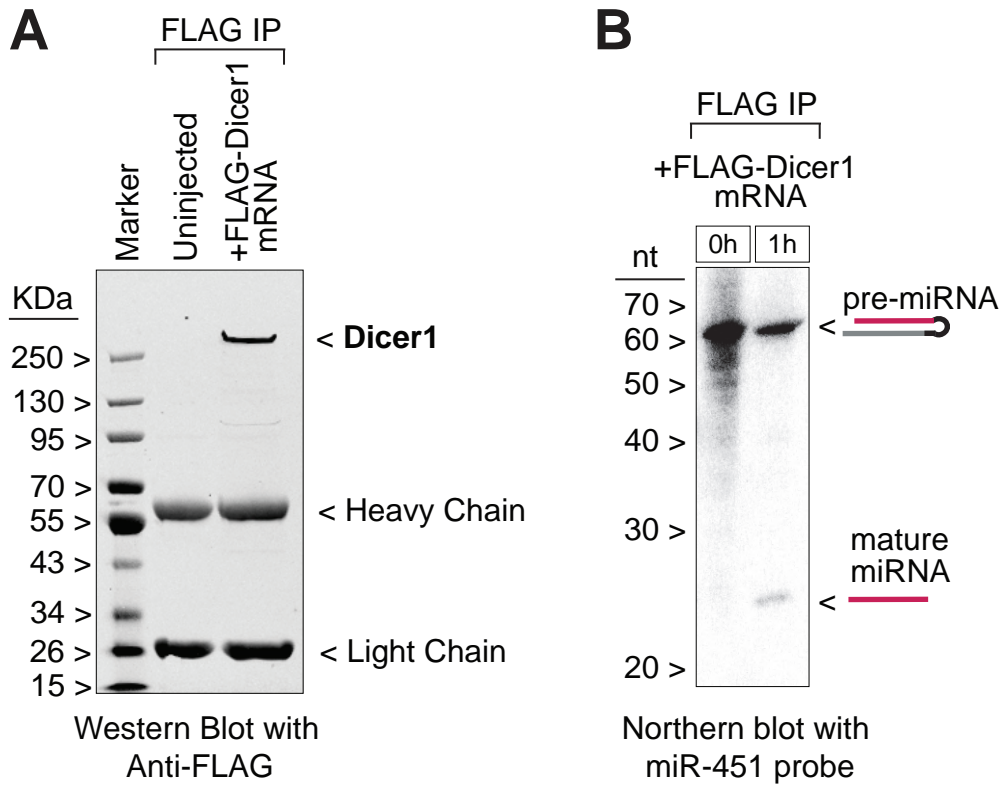

**C**

miR-144-3p-v1 target sites in HMGN2 3'UTR across vertebrates according to TargetScan

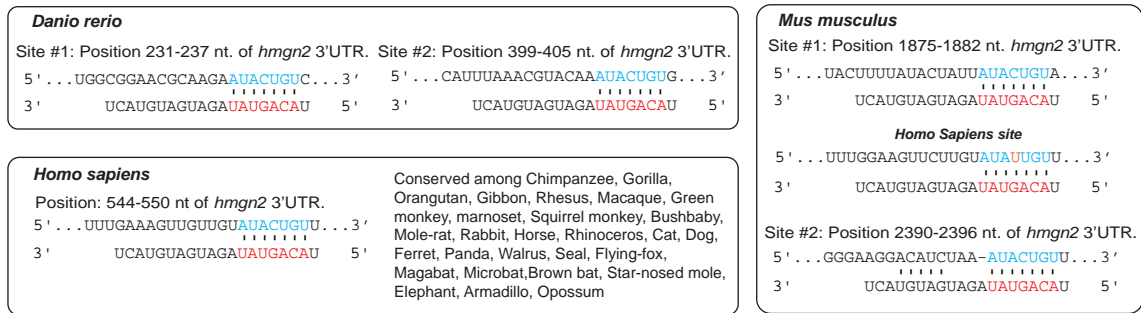

**D**

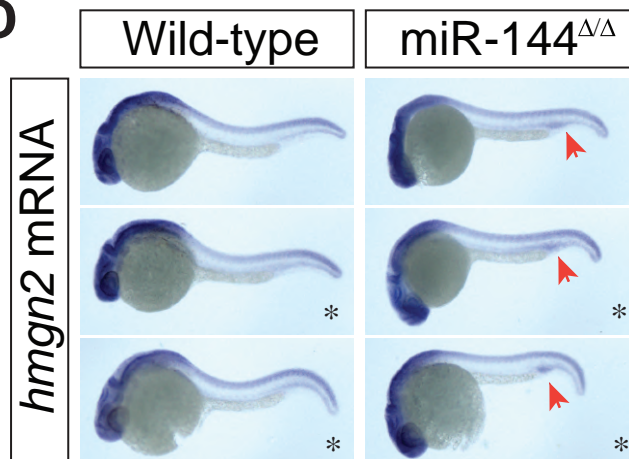

**Figure S2. Related to Main Figure 2.**

**(A)** Western blot showing the expression of Dicer1 in injected embryos. ~100 embryos injected with an *in vitro* transcribed mRNA encoding FLAG-Dicer1 are subjected to pull-down with FLAG antibody linked to magnetic beads and then resolved in a Western blot with FLAG antibody.

**(B)** Dicing assay. FLAG-Dicer1 expressed in embryos injected with mRNA encoding FLAG-Dicer1 is pull-down with FLAG-antibody coated beads. Then the bead pellet is used to process a microRNA precursor, in this case pre-miR-451 that has been engineered to be Dicer-dependent. The Northern blot with a miR-451 probe shows that at the initial time point only the microRNA precursor is present, while one hour later we can also observe the mature miRNA, the product of Dicer-mediated cleavage.

**(C)** Predicted miR-144-3p-v1 (according to TargetScan target sites in *Hmgn2* 3'UTR of *Danio rerio*, *Homo sapiens* and *Mus musculus*. miR-144 seed region is indicated in red.

**(D)** (Related to Fig. 2D) Whole-mount *in situ* hybridization of *hmgn2* mRNA at 30-hpf of miR-144<sup>ΔΔ</sup> fish and wild-type siblings. The embryos presented in the figure are representative of an experiment with n=17 embryos of each genotype. Blue staining indicates the presence of *hmgn2* mRNA. Red arrowhead points to the area where *hmgn2* mRNA accumulates upon the loss of miR-144. A close-up cropped image is shown in main Figure 2D for the embryos marked with an asterisk.

# Figure S3

**A** UMAP plot colored by genotype

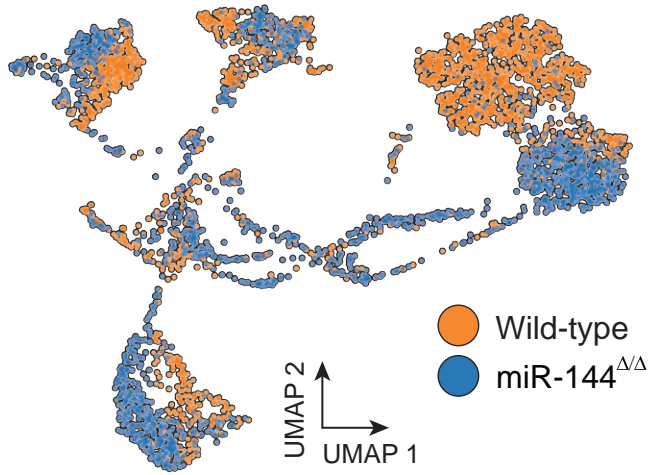

**B** Cluster connectivity assigned with PAGA

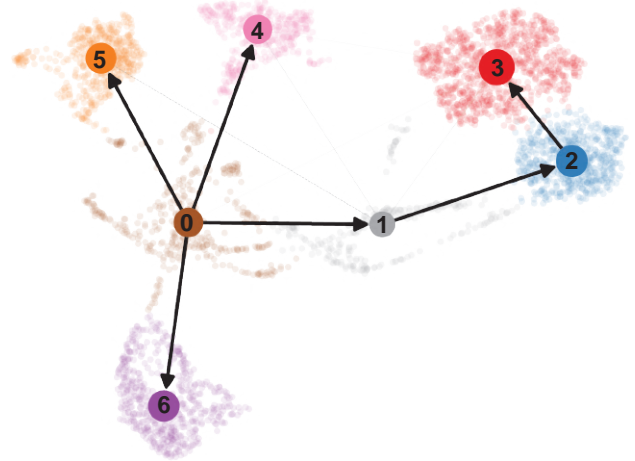

**C** Cluster assignment to hematopoietic lineages

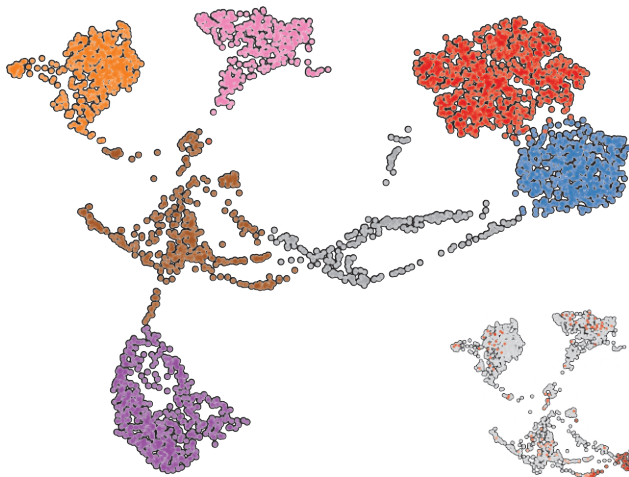

|                           | Cells per cluster |                       |
|---------------------------|-------------------|-----------------------|
|                           | WT                | miR-144 <sup>ΔΔ</sup> |
| Hematopoietic progenitors | 170               | 248                   |
| Early erythrocytes        | 57                | 192                   |
| Intermediate erythrocytes | 133               | 468                   |
| Mature erythrocytes       | 943               | 45                    |
| T-cells                   | 243               | 168                   |
| B-cells                   | 309               | 205                   |
| Neutrophils               | 179               | 375                   |
| Total =                   | 2,034             | 1,701                 |

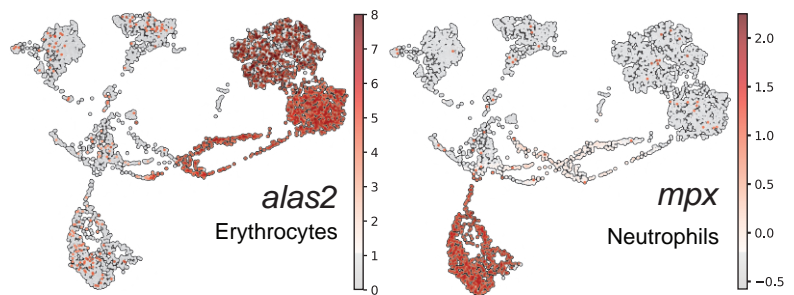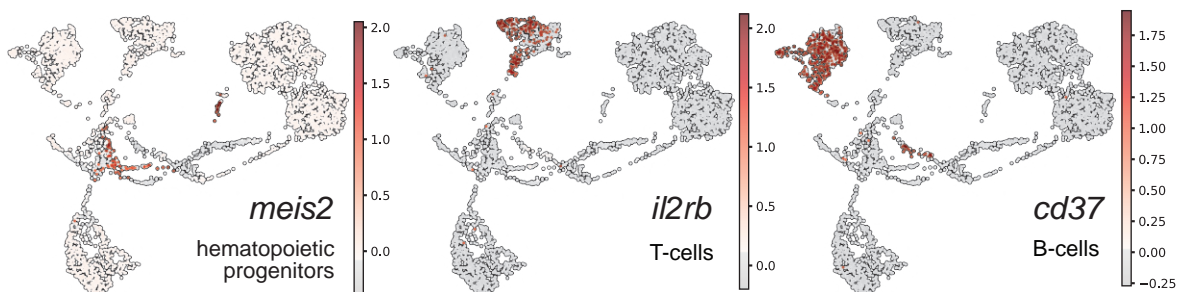

**Figure S3. Related to Main Figure 2. Detailed analysis of scRNA-Seq data of hematopoietic tissue from wild-type and miR-144 mutant embryos.**

**(A)** UMAP of scRNA-Seq data from zebrafish pronephros. Each dot represents a single cell. The plot is colored according to the genotype of origin. The data is collected from 1 wild-type pronephros and 1 miR-144 mutant pronephros.

**(B)** UMAP plot showing developmental trajectories between clusters. Developmental trajectories were inferred using scVelo and plotted (black arrows) applying partition-based graph abstraction (PAGA).

**(C)** Cluster assignment to the major hematopoietic lineages. UMAP is colored according to the expression levels of marker genes representative of each main hematopoietic cell lineage. Table shows number of cells in each cluster according to the genotype of origin.

# Figure S4

**A**

1  
**HMGN2-WT** MPKRRKIDGEEKGAKGKKEEPTRRSARLSAKPAPPKPEPKAK  
**HMGN2  $\Delta$ 12** MPKRRK-----PTRRSARLSAKPAPPKPEPKAK

40  
**HMGN2-WT** KAAPKKAAGKGGKSNPAENGDADQAQKVDATGDAK  
**HMGN2  $\Delta$ 12** KAAPKKAAGKGGKSNPAENGDADQAQKVDATGDAK

**B**

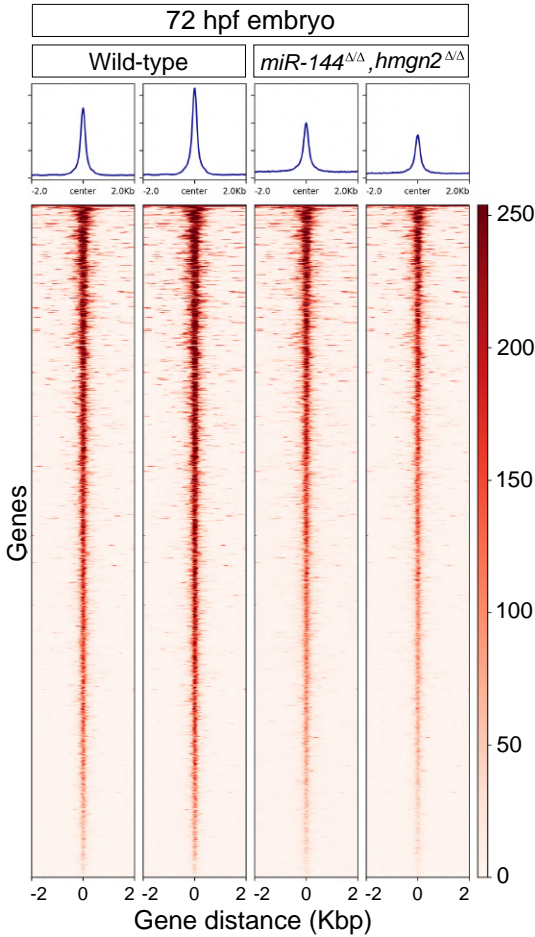



**Figure S4. Related to Main Figure 4.**

**(A)** Aminoacid sequence alignment of wild-type and mutant zebrafish Hmgn2. Alignment gap indicated the deletion induced with CRISPR/Cas9.

**(B)** Heat maps display variations in chromatin accessibility, determined through ATAC-Seq analysis of two separate samples obtained from erythrocytes isolated from peripheral blood at 72 hours post-fertilization (hpf) in both wild-type and double mutant miR-144<sup>ΔΔ</sup>, Hmgn2<sup>ΔΔ</sup> embryos.

# Figure S5

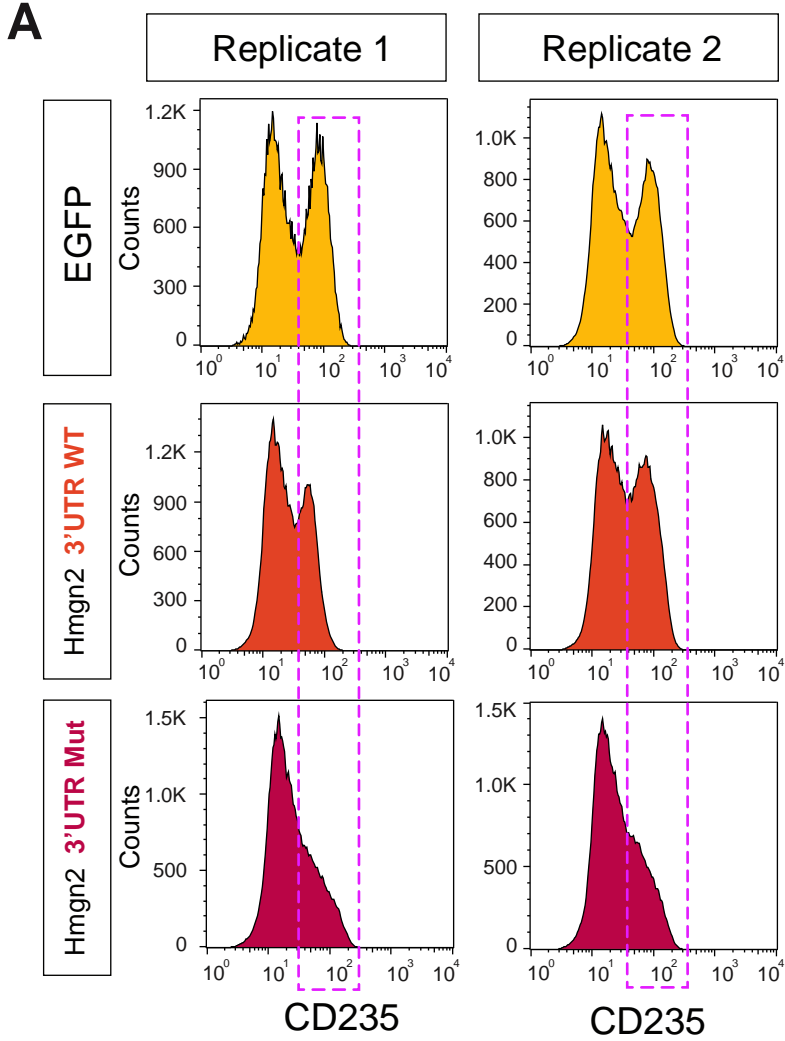

**Figure S5. Related to Main Figure 5. Flow cytometry analysis of human erythroid progenitor cells with different levels of HMGN2 activity.**

**(A)** Flow cytometry analysis (FACS) of erythroid cells at 7 days of differentiation to quantify the expression levels of CD235. Pink box indicates the CD235<sup>+</sup> population of cells. This data is an independent biological replicate from the data presented in main figure 5G.
