# Supplementary material for: The miR-144/Hmgn2 regulatory axis orchestrates chromatin organization during erythropoiesis
Source: PubMed Central journal article supplement (PMC11076586; doi:10.1038/s41467-024-47982-2), 2024-05-07
Supplement: 41467_2024_47982_MOESM3_ESM.pdf [file 41467_2024_47982_MOESM3_ESM.pdf]

## **Description of Additional Supplementary Files**

**File Name: Supplementary Data 1**

**Description:** Table containing the sequence of the oligonucleotides used in this manuscript.
